# Supplementary material
Source: publisher site journal article supplement (https://www.dovepress.com/article/468036)
Supplement: Supplementary file 1 [file get_supplementary_file.php]

**Supplementary Material**

**Table S1** Limb position, dynamometer and movement for each tested muscle group

| **Muscle group** | **Limb position** | **Dynamometer placement** | **Movement for test** |
| --- | --- | --- | --- |
| **Hip flexion strength (HFS)** | Seated position, hip flexed to 45°, knee flexed to 90° | Extensor thigh, proximal to knee joint | Performing the hip flexion movement |
| **Knee extension strength (KES)** | Seated position, hip and knee flexed to 90° | Tibial surface, proximal to ankle joint | Performing the knee extension movement |
| **Knee flexion strength (KFS)** | Seated position, hip flexed to 90°, knee flexed to 45° | Near the ankle joint on the flexed side of the calf | Performing the knee flexion movement |
| **Ankle dorsiflexion strength (ADS)** | Supine position, knee extended, ankle at 90° | Above the dorsum of the foot | Performing the dorsiflexion movement of the foot |
| **Elbow flexion strength (EFS)** | Supine position, upper arm was close to the trunk, with the elbow joint flexed at 30-40° | Inner side near wrist joint | Performing elbow flexion |
| **Elbow extension strength (EES)** | Supine position, upper arm was close to the trunk, with the elbow joint flexed at 90-100° | Lateral side near the wrist joint | Performing elbow extension |

# Table S2 Conformity rate and kappa coefficient of sarcopenia-AC and sarcopenia-CC in the experimental group

|  | Sex | Sarcopenia-AC/CC | Sarcopenia-AWGS | | Total | Conformity rate (%) | Kappa values | *P** |
| --- | --- | --- | --- | --- | --- | --- | --- | --- |
|  | Positive | Negative |
| Sarcopenia-AC | Male | Positive | 37 | 71 | 108 | 84.06 | 0.416 | <0.001 |
|  |  | Negative | 6 | 369 | 375 |  |  |  |
|  |  | Total | 43 | 440 | 483 |  |  |  |
|  | Female | Positive | 63 | 160 | 223 | 68.63 | 0.241 | <0.001 |
|  |  | Negative | 26 | 344 | 370 |  |  |  |
|  |  | Total | 89 | 504 | 593 |  |  |  |
| Sarcopenia-CC | Male | Positive | 38 | 80 | 118 | 82.40 | 0.393 | <0.001 |
|  |  | Negative | 5 | 360 | 365 |  |  |  |
|  |  | Total | 43 | 440 | 483 |  |  |  |
|  | Female | Positive | 76 | 153 | 229 | 72.01 | 0.334 | <0.001 |
|  |  | Negative | 13 | 351 | 364 |  |  |  |
|  |  | Total | 89 | 504 | 593 |  |  |  |

**Note:** ******P*** values of the statistical analysis of Kappa values.

**Abbreviations**: AC: arm circumference; CC, calf circumference; AWGS, Asian Working Group for Sarcopenia.

**Table S3** The validation of sarcopenia-AC and sarcopenia-CC in the validation group

|  | Sex | Sarcopenia-AC/CC | Sarcopenia-AWGS | | Total | Conformity rate (%) | PPV | NPV | Kappa value | *P** |
| --- | --- | --- | --- | --- | --- | --- | --- | --- | --- | --- |
|  | Positive | Negative |
| Sarcopenia-AC | Male | Positive | 8 | 29 | 37 | 82.61 | 0.216 | 0.959 | 0.228 | <0.001 |
|  |  | Negative | 7 | 163 | 170 |  |  |  |  |  |
|  |  | Total | 15 | 192 | 207 |  |  |  |  |  |
|  | Female | Positive | 19 | 71 | 90 | 67.32 | 0.211 | 0.927 | 0.162 | 0.001 |
|  |  | Negative | 12 | 152 | 164 |  |  |  |  |  |
|  |  | Total | 31 | 223 | 254 |  |  |  |  |  |
| Sarcopenia-CC | Male | Positive | 12 | 54 | 66 | 72.46 | 0.182 | 0.979 | 0.202 | <0.001 |
|  |  | Negative | 3 | 138 | 141 |  |  |  |  |  |
|  |  | Total | 15 | 192 | 207 |  |  |  |  |  |
|  | Female | Positive | 28 | 80 | 108 | 67.32 | 0.259 | 0.980 | 0.263 | <0.001 |
|  |  | Negative | 3 | 143 | 146 |  |  |  |  |  |
|  |  | Total | 31 | 223 | 254 |  |  |  |  |  |

**Note:** ******P*** values of the statistical analysis of Kappa values.

**Abbreviations**: AC, arm circumference; CC, calf circumference; AWGS, Asian Working Group for Sarcopenia; PPV, positive predictive value; NPV, negative predictive value.

**Table S4** Screening Ability of Multiple Variables on Sarcopenia in the Experimental Group *

| Sex | AUC value | AUC SD | *P* | AUC 95%CI | |
| --- | --- | --- | --- | --- | --- |
| Upper | Lower |
| Male† | 0.962 | 0.010 | <0.001 | 0.942 | 0.982 |
| Female‡ | 0.904 | 0.014 | <0.001 | 0.876 | 0.932 |

**Note:** * The logistic regressions were performed. Being sarcopenia or not was the dependent variable, BMI, AC, CC, gait speed and handgrip strength were independent variables.

†The model for males was logit (P) = 29.811-0.719 BMI (kg/m2) - 0.105 handgrip strength (kg) - 3.011gait speed (m/s).

‡ The model 2 for females was logit (P) = 14.5590.057 age (year) - 0.646 BMI (kg/m2) 0.299 AC (cm) -0.290 CC (cm) - 0.105 handgrip strength (kg) - 2.881gait speed (m/s)

**Abbreviations:** AUC, aera under curve; SD, standard deviation; CI, confidence interval.
